# Supplementary material for: Yeast casein kinase 2 governs morphology, biofilm formation, cell wall integrity, and host cell damage of Candida albicans
Source: PubMed Central journal article supplement (PMC5673188; doi:10.1371/journal.pone.0187721), 2017-11-06
Supplement: pone.0187721.s004.pdf [file pone.0187721.s004.pdf]

**S1 Table. Strains used in this study**

| Strain name | Genotype                                                                                                               | Reference  |
|-------------|------------------------------------------------------------------------------------------------------------------------|------------|
| SC5314      | Wild-type                                                                                                              | 90         |
| BWP17       | <i>ura3Δ::λimm434::ura3Δ::λimm434 arg4::hisG/arg4::hisG his1::hisG/his1::hisG</i>                                      | 80         |
| DIC185      | <i>ura3Δ::λimm434::URA3-IRO1/ura3Δ::λimm434 arg4::hisG::ARG4/arg4::hisG his1::hisG::HIS1/his1::hisG</i>                | 81         |
| JJH34H      | <i>ura3Δ::λimm434::ura3Δ::λimm434 yck2-Tn7::UAU1/yck2-Tn7::URA3::pHIS1</i>                                             | 37         |
| JAC1401U    | <i>ura3Δ::λimm434::ura3Δ::λimm434 yck2Δ::HIS1/yck2Δ::ARG4, his1/his1, arg4/arg4 URA3/ura3</i>                          | This study |
| JAC14010    | <i>ura3Δ::λimm434::ura3Δ::λimm434 yck2Δ::HIS1/yck2Δ::ARG4, his1/his1, arg4/arg4 ura3::URA3-YCK2/ura3</i>               | This study |
| vps15 mut   | <i>vps15Δ::HIS1/vps15Δ::ARG4 RP10::URA3 ura3Δ::λimm434/ ura3Δ::λimm434 arg4::hisG/arg4::hisG his1::hisG/his1::hisG</i> | 91         |
