# Supplementary material for: Yeast casein kinase 2 governs morphology, biofilm formation, cell wall integrity, and host cell damage of Candida albicans
Source: PLoS One. 2017 Nov 6;12(11):e0187721. doi: 10.1371/journal.pone.0187721 (PMC5673188; doi:10.1371/journal.pone.0187721)
Supplement: S2 Table — (PDF) [file pone.0187721.s005.pdf]

**S2 Table. Primers used in this study**

| Description            | Primer Name    | Sequence                                                                                                     |
|------------------------|----------------|--------------------------------------------------------------------------------------------------------------|
| Strain construction    | YCK2KO-5       | GATCTCCACTCTCTTCCTCCTCCTTCTTTCTTTCTTTCTTTCTTTCTCCTTCTCCTTCTCCTTCTCCTTCGTTGAGTGTGGAATTGTGAGC<br>GGATA         |
|                        | YCK2KO-3       | TGGAAATCCAAATTTATCATATCTTTGTATATCAAAAAAACTTA<br>ACAAAAACACATAAAAAATAGTAGCAAAATTCCAGTGCTTTCCCA<br>GTCACGACGTT |
|                        | YCK2 Comp-5    | GCATGCTAAATAATTGGTGGTGTGG                                                                                    |
|                        | YCK2 Comp-3    | TGCAATTAGACCCTTTTCTTCC                                                                                       |
|                        | YCK2 Confirm-5 | CTCTCTGTCTCTCTCTTAC                                                                                          |
|                        | YCK2 Confirm-3 | GCTTGGCTTGAGCTTGTAAATTG                                                                                      |
| Transcription analysis | ACT1-F         | CTTCTCAATCTTCTGCCATTGA                                                                                       |
|                        | ACT1-R         | TTCTGGACTCTGAATCTTTCG                                                                                        |
|                        | ALS3-F         | TGCTCCATCGCAACTTCAA                                                                                          |
|                        | ALS3-R         | GCGATTGAGATTGGTTGGTT                                                                                         |
|                        | BCR1-F         | AATGCCTGCAGGTTATTTGG                                                                                         |
|                        | BCR1-R         | TTTAGGTGGTGGTGGCAAT                                                                                          |
|                        | CHS1-F         | TGAGGACGAAGTTGCATTTG                                                                                         |
|                        | CHS1-R         | CCAGCTATCTTTGCCCCATA                                                                                         |
|                        | CHS2-F         | ATCGACTTGGGGGAAAGATT                                                                                         |
|                        | CHS2-R         | TGCCAATAATGCTTGTGCTC                                                                                         |
|                        | CHS3-F         | TGCCATGTCGTCTTTTCAAC                                                                                         |
|                        | CHS3-R         | CATCACGAGCGGTCTCACTA                                                                                         |
|                        | CHS8-F         | TGGAATCGGTGTTTGGATT                                                                                          |
|                        | CHS8-R         | CGGACCTTCTCCATTGACAT                                                                                         |
|                        | CPH1-F         | AAAGGCAATACCGCAAACCTG                                                                                        |
|                        | CPH1-R         | CCGGTATTTCTGCTGGGTAA                                                                                         |
|                        | EFG1-F         | CCCCATACCTTCCAATTCT                                                                                          |
|                        | EFG1-R         | TTGGTTGTTGCATTGTCGAT                                                                                         |
|                        | GSC1-F         | GAACCTGGTTGCATTTCTGTT                                                                                        |
|                        | GSC1-R         | AGGTTGGGGAGTTGTAAGCA                                                                                         |
|                        | GSL1-F         | TGTTGATATGGGGTGAAGCA                                                                                         |
|                        | GSL1-R         | TGGGAAGATTGGGACCATTA                                                                                         |
|                        | GSL2-F         | AGGTCTAACCGCTCATGGTG                                                                                         |
|                        | GSL2-R         | TCGCTCAATTGTCATACAGC                                                                                         |
|                        | HGC1-F         | GTATCGCTGGTTCTCGTGC                                                                                          |
|                        | HGC1-R         | GACTCCACTCATAACACTACC                                                                                        |
|                        | HOG1-F         | GGGACTGTTTTGAAATCACC                                                                                         |
|                        | HOG1-R         | TCTTTTGCCAATACTGAGGTCA                                                                                       |
|                        | HRR25-F        | CAACTCCCACCACAACAACA                                                                                         |
|                        | HRR25-R        | TTGTGGAGGTTGTTGGGCTT                                                                                         |
|                        | HWP1-F         | GCTGGCTCAAGTGGTGCTAT                                                                                         |
|                        | HWP1-R         | GGTTGCATGAGTGGAAGTGA                                                                                         |
|                        | MKC1-F         | GTAAACGTGCTTTGCGTGAA                                                                                         |
|                        | MKC1-R         | TCATGGGATTGGGGATAATG                                                                                         |
|                        | NRG1-F         | CAACACCACCACCATATCCA                                                                                         |
|                        | NRG1-R         | GGGTTGCAAGTGAGGTGATT                                                                                         |
|                        | RFG1-F         | ATTCCTCGACCAAGAAATGC                                                                                         |
|                        | RFG1-R         | GGGAACTTCAGGGTTGGTT                                                                                          |
|                        | SUN41-F        | AACCCTTCCCTTCCATCTG                                                                                          |
|                        | SUN41-R        | ACCAGAACCAGAACCACCAG                                                                                         |
|                        | TUP1-F         | AAAGTCGACCTGCGAGGTAA                                                                                         |
|                        | TUP1-R         | GCCCGACAAAATGTACTCGT                                                                                         |
|                        | UME6-F         | TCATTCTGCTGATTTGGTCAT                                                                                        |
|                        | UME6-R         | TTGCAGCAGCACTAACACTG                                                                                         |
|                        | YCK2-F         | CAGCATGGAGGAAAAACATGA                                                                                        |
|                        | YCK2-R         | TCTTCTTCTTCGGCAACCATG                                                                                        |
|                        | YCK3-F         | CCTTCTCAGGGACAAAGACG                                                                                         |
|                        | YCK3-R         | ATGCTTGATGGGGTGAATTG                                                                                         |
